# Supplementary material
Source: PubMed Central journal article supplement (PMC4873392)
Supplement: NIHMS768273-supplement-2.pdf [file NIHMS768273-supplement-2.pdf]

**Supplementary Table 1. Primer and antibodies list.**

| <b>Primers</b>    | <b>Sequence</b>                                                                       |
|-------------------|---------------------------------------------------------------------------------------|
| Abca1             | 5'-AAAACCGCAGACATCCTTCAG-3' and 5'-CATACCGAAACTCGTTCACCC-3'                           |
| Atg4b             | 5-CATGAATTTCTGGGGCACTT-3' and 5'-AGCCTTGGGATTCTCTCCAT-3'                              |
| Atg5              | 5'-AAAGATGTGCTTCGAGATGTGT-3' and 5'-CACTTTGTCAGTTACCAACGTCA-3'                        |
| Atg12             | 5'-TGGCCTCGGAACAGTTGTTTA-3' and 5'-GGGCAAAGGACTGATTCACAT-3'                           |
| Atg16l1           | 5'-CAGAGCAGCTACTAAGCGACT-3' and 5'-AAAAGGGGAGATTCGGACAGA-3'                           |
| Ctsb              | 5'-TTGCGTTCGGTGAGGACATAG-3' and 5'-GCAGGAGCCCTGGTCTCTA-3'                             |
| Gapdh             | 5'-TGTGAGGGAGATGCTCAGTG-3' and 5'-TGTTCTACCCCAATGTGT-3'                               |
| Foxo3             | 5'-GGGGAACCTGTCCTATGCC-3' and 5'-TCATTCTGAACGCGCATGAAG-3'                             |
| Lamp1             | 5'-CCCCACTGTATCCAAGTACAATG-3 and 5'-TGTTGTCCTTTTTTCAGGTAGGTG-3'                       |
| Lipa              | 5'-TGTTTCGTTTTCCACCATTGGGA-3' and 5'-CGCATGATTATCTCGGTCACA-3'                         |
| Prkaa1            | 5'-GTCAAAGCCGACCCAATGATA-3' and 5'-CGTACACGCAAATAATAGGGGTT-3'                         |
| Srebfb2           | 5'-GCAGCAACGGG-3' and 5'-CCCCATGACTA-3'                                               |
| Tcfef1            | 5'-GCAGCCACCTGAACGTGTA-3' and 5'-TGTTAGCTCTCGCTTCTGAGT-3'                             |
| Uvrag             | 5'-ACATCGCTGCTCGGAACATT-3' and 5'-CTCCACGTCGGATTCAAGGAA-3'                            |
| <b>Antibodies</b> | <b>Information (WB=western blot, IF=immunofluorescence, IP=immunoprecipitation)</b>   |
| Anti-LC3          | MBL international, PD014 (1:1000 dilution for WB)                                     |
| Anti-LC3          | MBL international, PM036 (1:100 dilution for IF)                                      |
| Anti-Atg5         | Novus Biologicals, NB110-53818 (1:500 dilution for WB)                                |
| Anti-Atg12        | Cell Signaling Technology, Cat#4180 (1:1000 dilution for WB)                          |
| Anti-Ago2         | Cell Signaling, Argonaute 2 (C34C46) Rabbit mAb (1:50 dilution for IP)                |
| Anti-AMPK         | Cell Signaling, Anti-AMPK $\alpha$ , Cat#2603 (1:1000 dilution for WB)                |
| Anti-p-AMPK       | Cell Signaling, Anti-phospho-AMP $\alpha$ (Thr172), Cat#2535 (1:1000 dilution for WB) |
| Anti-TFEB         | Novus Biologicals, NBP1-67872 (1:500 for WB and                                       |
| Anti-FoxO3a       | Cell Signaling, Cat#2497 (1:1000 for WB and 1:200 for IF)                             |
| Anti-Lamp1        | Cell Signaling, Cat# 3243 (1:1000 dilution for WB)                                    |
| Anti-p62          | Abnova, Anti-SQSTM1 (p62), Cat#H00008878-M01 (1:100 dilution for IF)                  |
| Anti-Tubulin      | Sigma-Aldrich, Cat#T6074 (1:1000 dilution for WB)                                     |
| Anti-HSP90        | Fisher Scientific, Cat#BDB610419 (1:100 dilution for WB)                              |
